# Supplementary material
Source: MDPI journal article supplement (https://www.mdpi.com/2218-0532/89/4/52)
Supplement: s1 [file s1]

*Supplementary*

# Synthesis and Biological Activity Evaluation of Novel 5-Methyl-7-Phenyl-3*H*-Thiazolo[4,5-*b*]Pyridin-2-Ones

Andrii Lozynskyi <sup>1</sup>, Yulian Konechnyi <sup>2</sup>, Julia Senkiv <sup>3</sup>, Ihor Yushyn <sup>1</sup>, Dmytro Khylyuk <sup>4</sup>, Olexandr Karpenko <sup>5</sup>, Yulia Shepeta <sup>6</sup> and Roman Lesyk <sup>1,7,\*</sup>

<sup>1</sup> Department of Pharmaceutical, Organic and Bioorganic Chemistry, Danylo Halytsky Lviv National Medical University, 69 Pekarska, 79010 Lviv, Ukraine; lozynskyiandrii@gmail.com (A.L.);

ihor.yushyn@gmail.com (I.Y.)

<sup>2</sup> Department of Microbiology, Danylo Halytsky Lviv National Medical University, 69 Pekarska, 79010 Lviv, Ukraine; yuliankonechnyi@gmail.com

<sup>3</sup> Institute of Cell Biology, NAS of Ukraine, 14/16 Drahomanova, 79005, Lviv, Ukraine; yu.senkiv@gmail.com

<sup>4</sup> Department of Organic Chemistry, Medical University of Lublin, Aleje Racławickie 1, 20-059 Lublin, Poland; dmytrokhylyuk@gmail.com

<sup>5</sup> Enamine Ltd., 23 Alexandra Matrosova, 01103 Kyiv, Ukraine; karalexander@gmail.com

<sup>6</sup> Department of Pharmaceutical Chemistry, National Pirogov Memorial Medical University, 56 Pirogov, 21018 Vinnytsya, Ukraine; shepeta.yulia@gmail.com

<sup>7</sup> Department of Biotechnology and Cell Biology, Medical College, University of Information Technology and Management in Rzeszow, Sucharskiego 2, 35-225 Rzeszow, Poland

\* Correspondence: dr\_r\_lesyk@org.lviv.net; Tel.: +38-032-275-5966

## Table of Contents

Copies of  $^1\text{H}$ ,  $^{13}\text{C}$ -NMR and LC-MS spectra of compounds **3a-g**

S1–S18

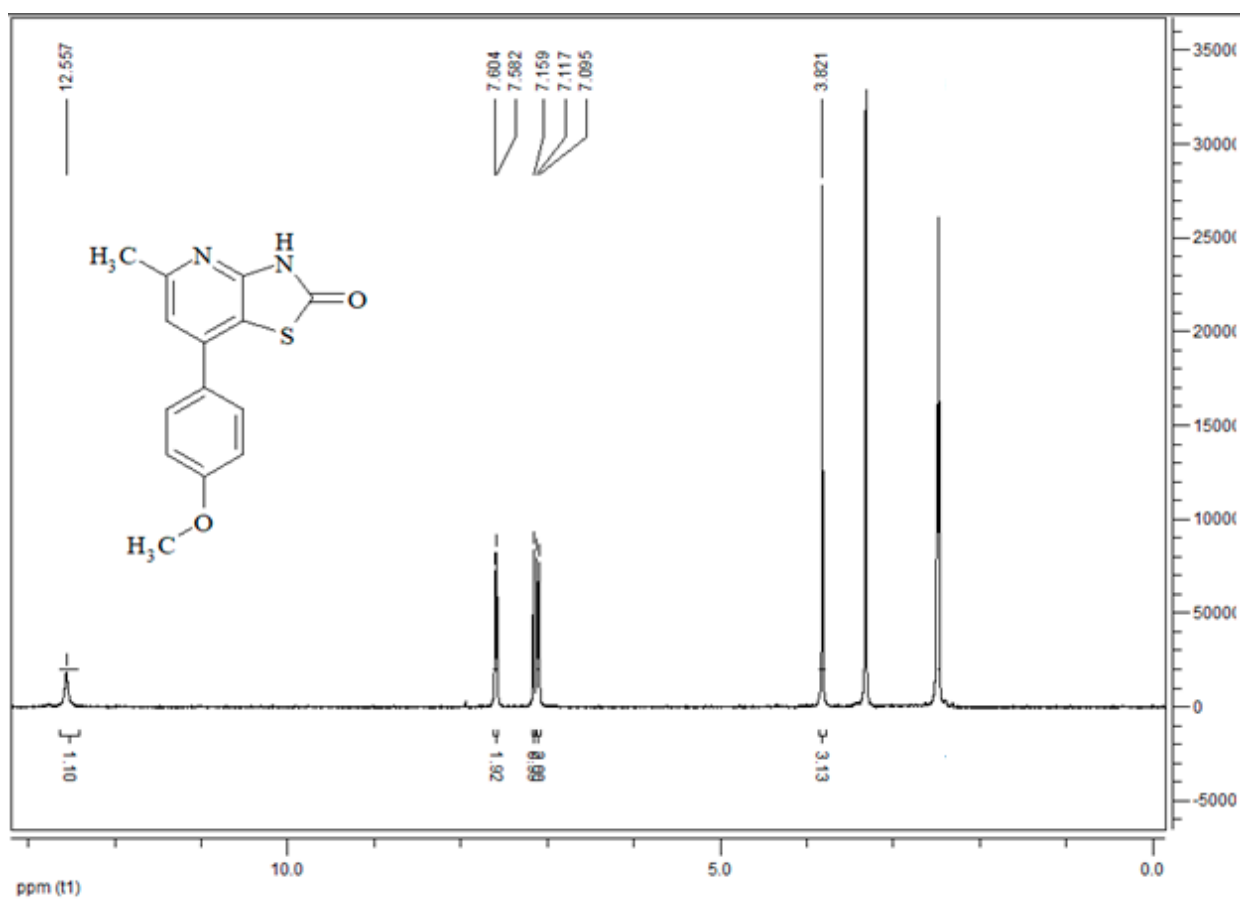

Figure S1.  $^1\text{H}$  NMR spectrum **3a**.

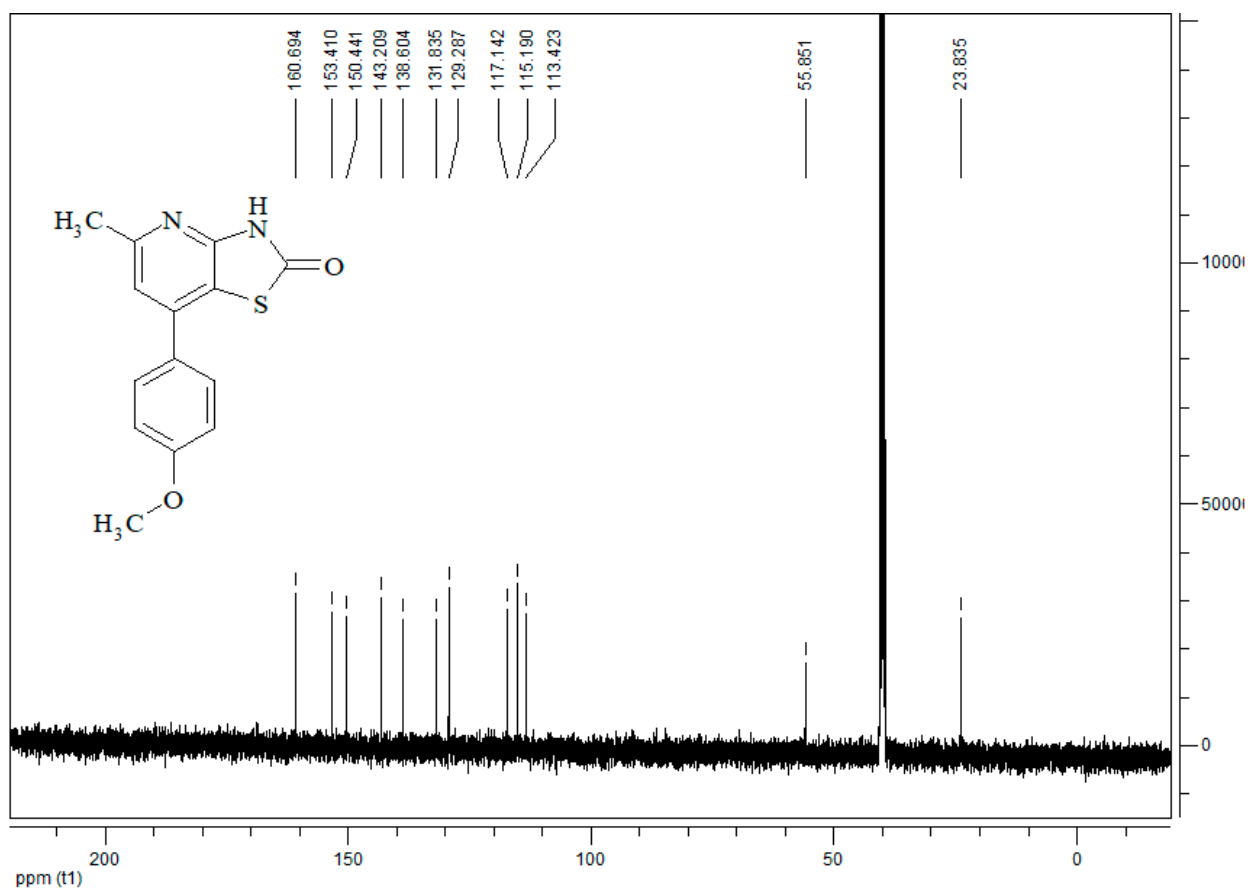

Figure S2. <sup>13</sup>C NMR spectrum 3a.

Mol Wt  
Exact Mass

| # | Time  | Area% |
|---|-------|-------|
| 1 | 0.888 | 4.95  |
| 2 | 1.240 | 95.05 |

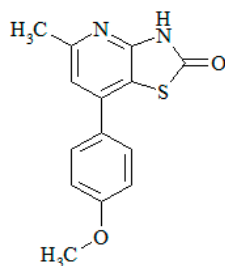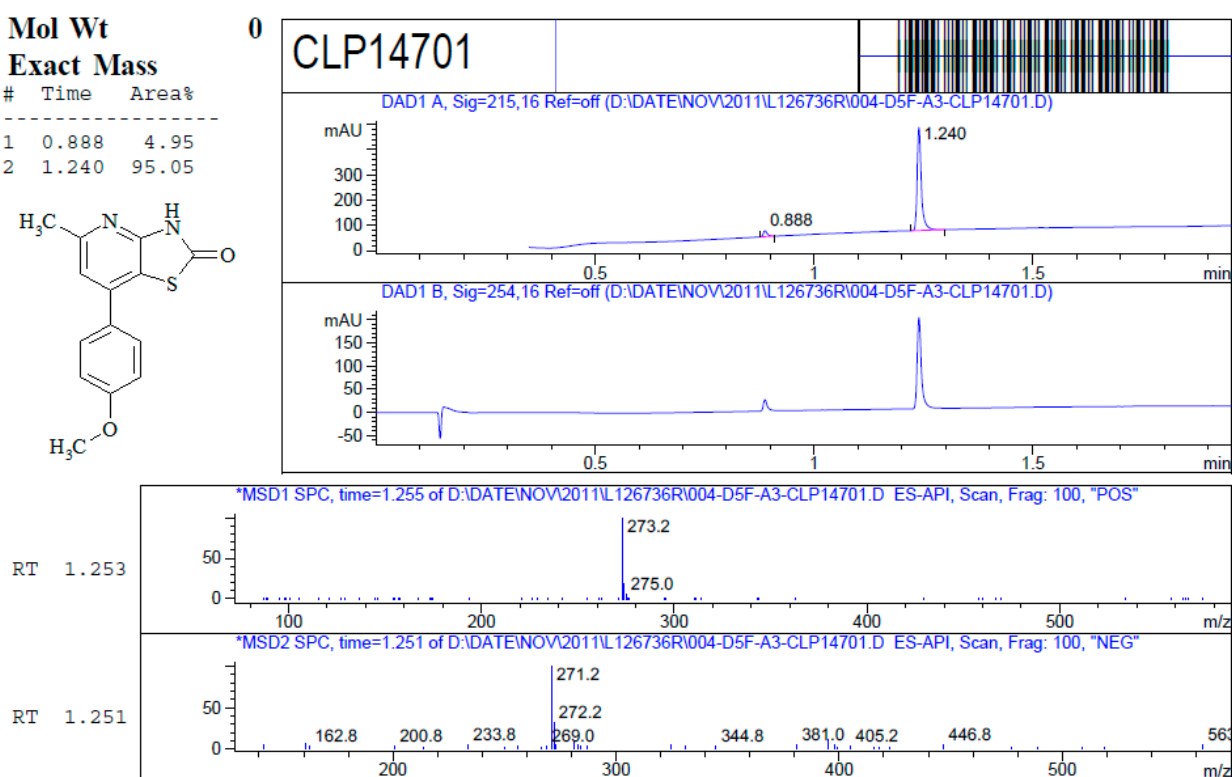

Figure S3. LC-MS spectrum 3a.

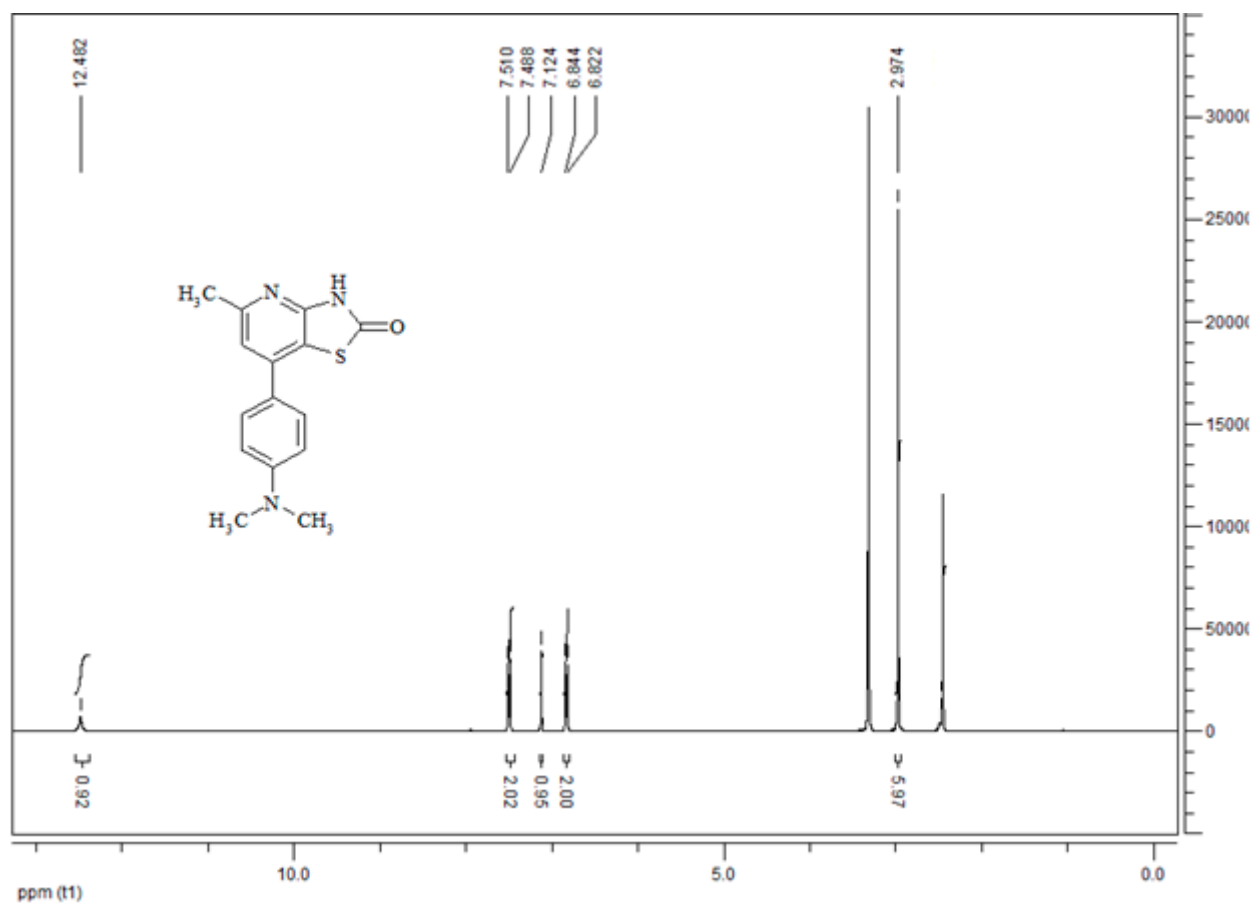

Figure S4. <sup>1</sup>H NMR spectrum 3b.

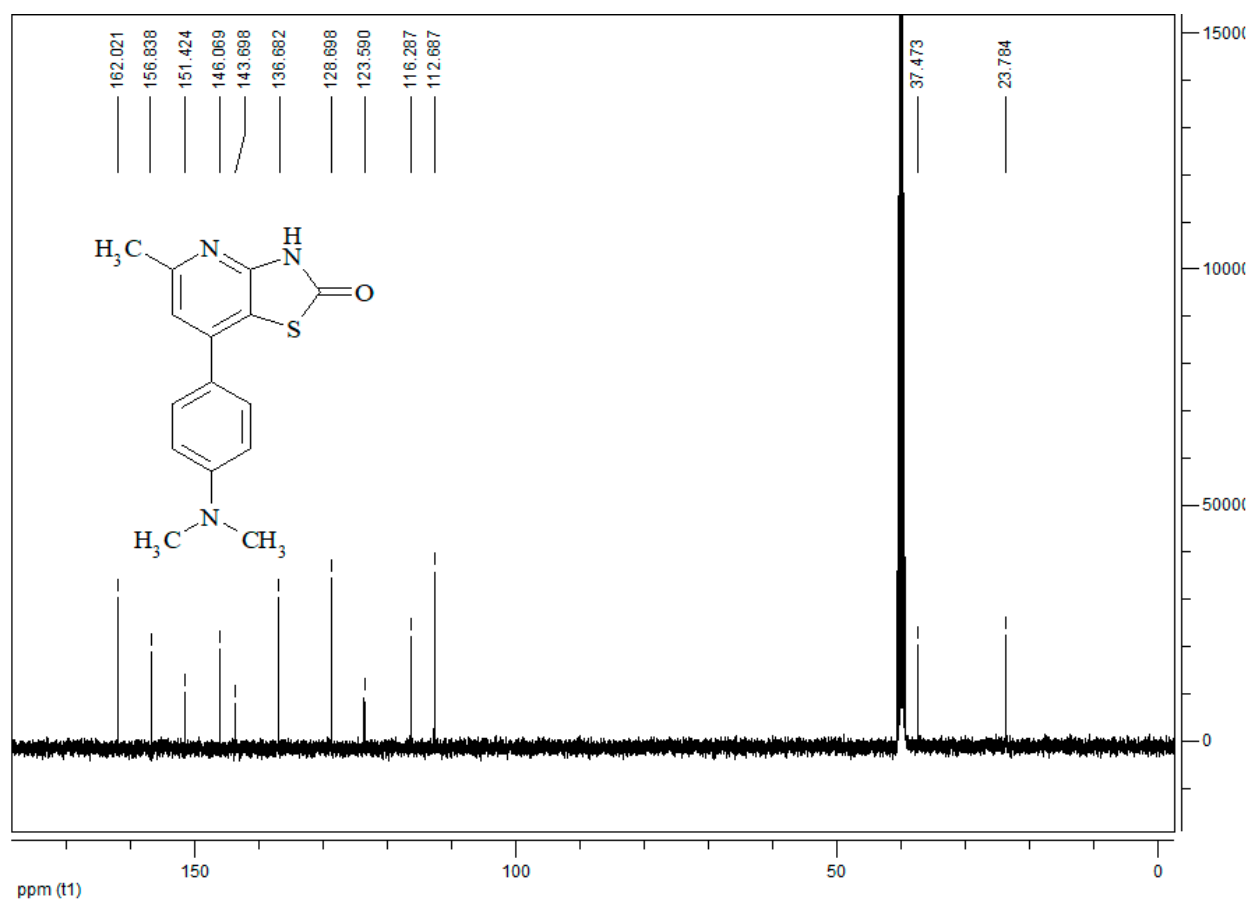

Figure S5.  $^{13}\text{C}$  NMR spectrum 3b.

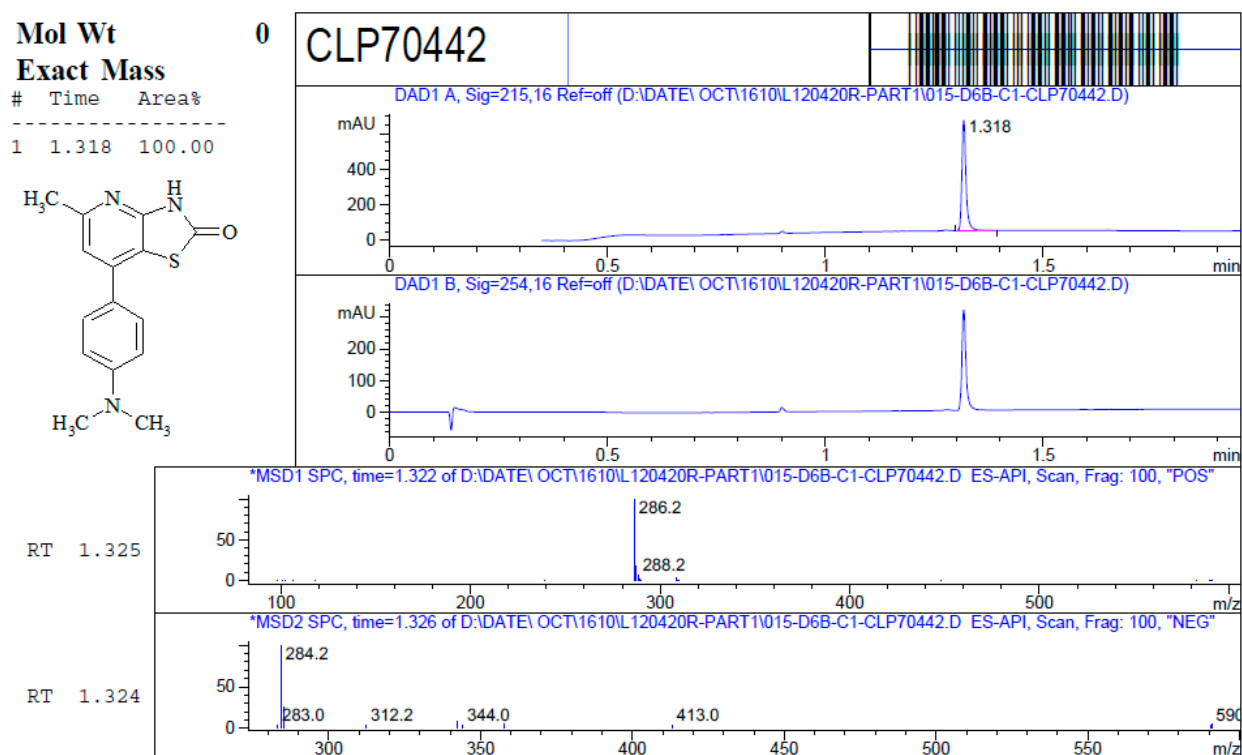

Figure S6. LC-MS spectrum 3b.

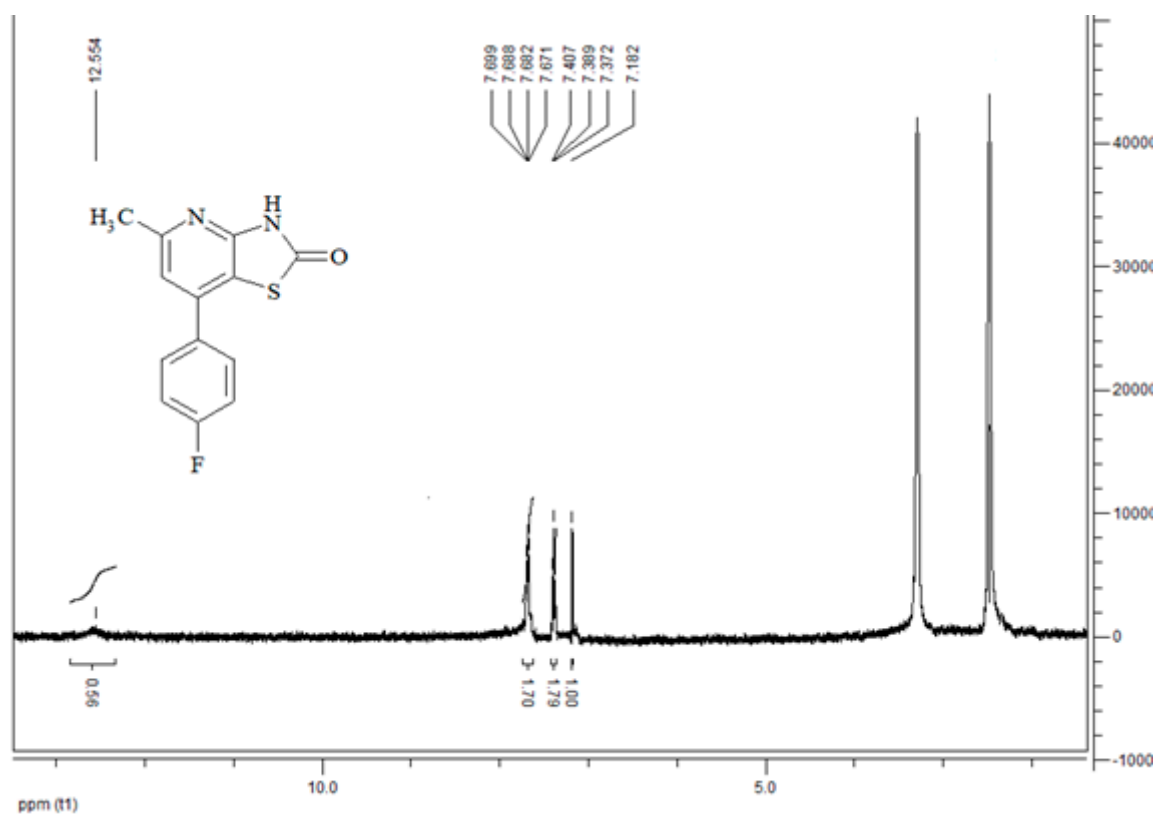

Figure S7.  $^1\text{H}$  NMR spectrum 3c.

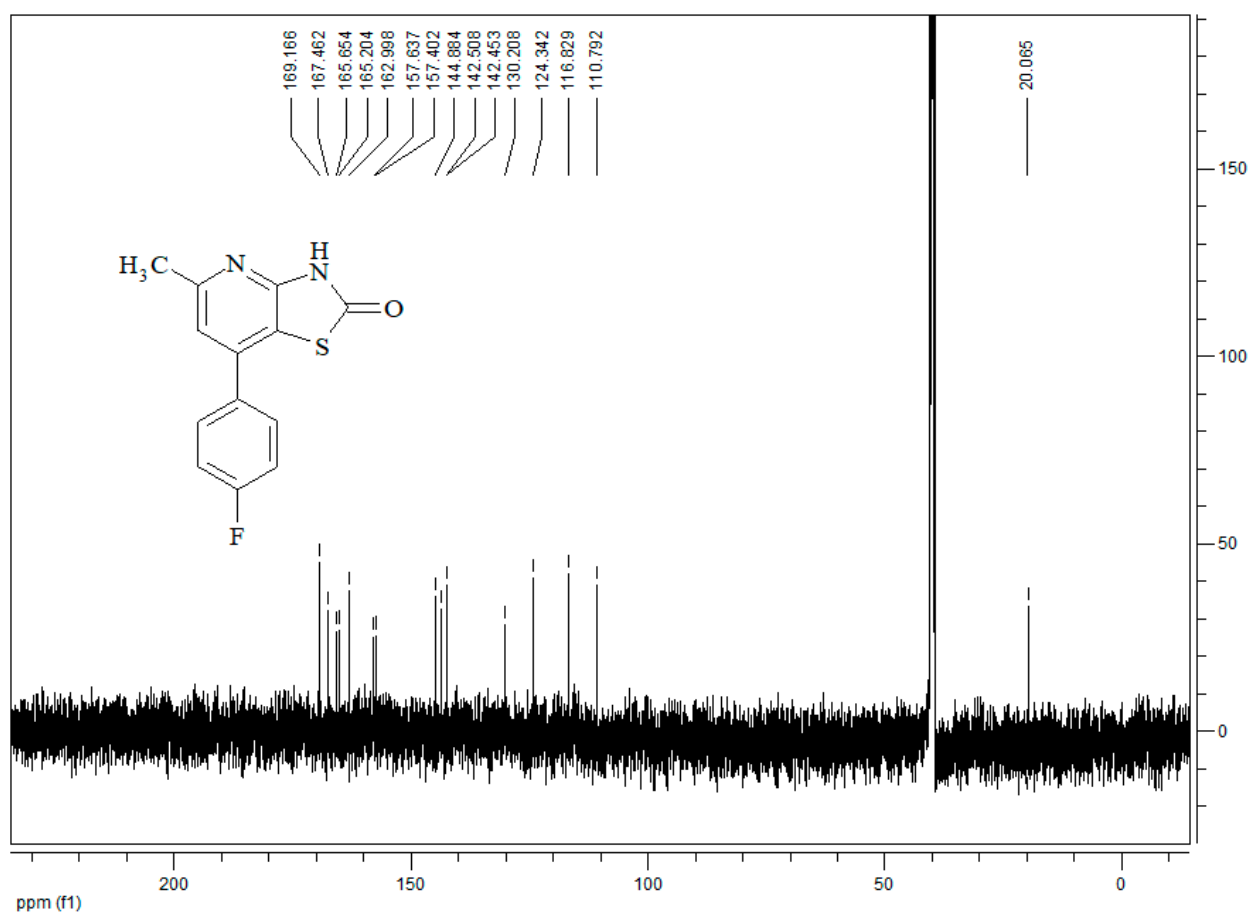

Figure S8. <sup>13</sup>C NMR spectrum 3c.

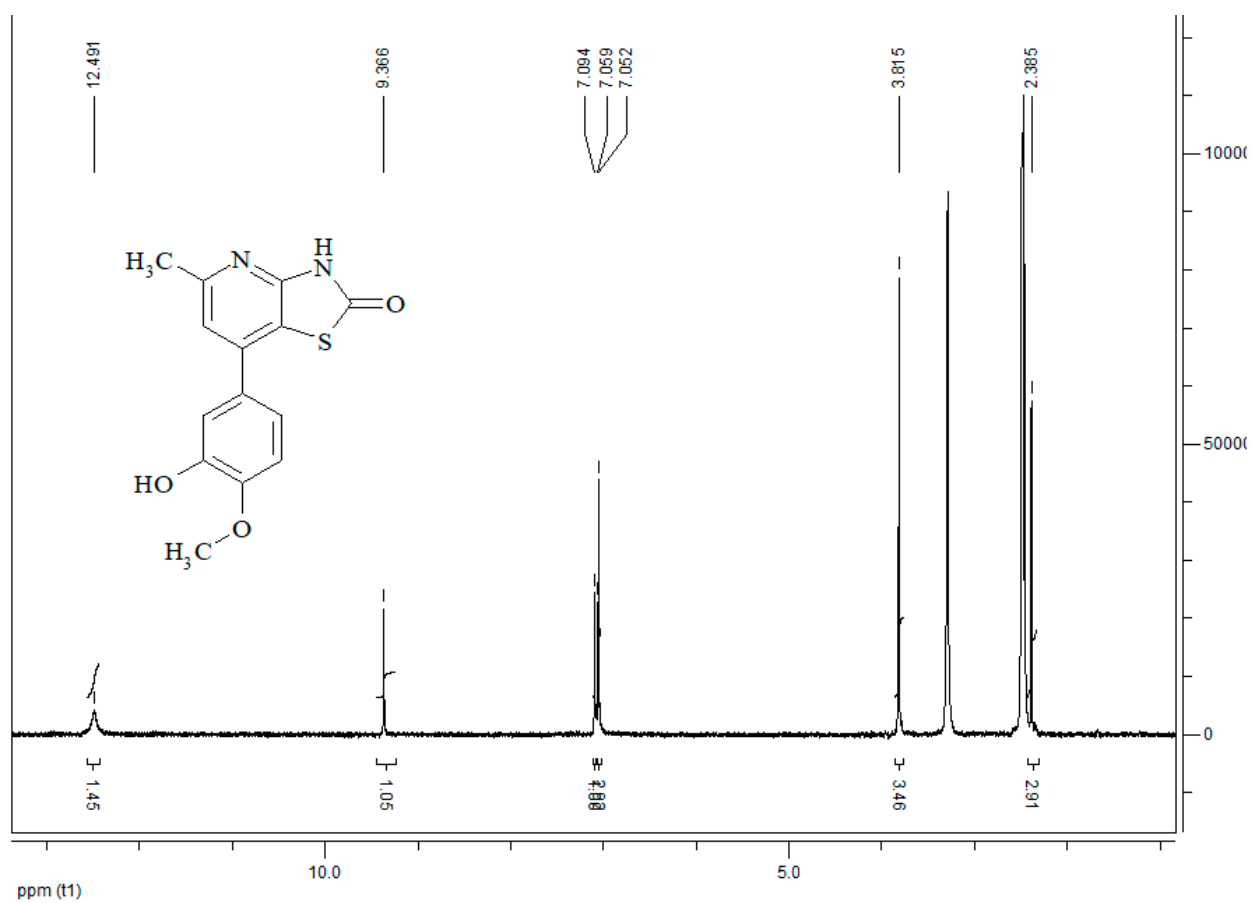

Figure S9.  $^1\text{H}$  NMR spectrum 3d.

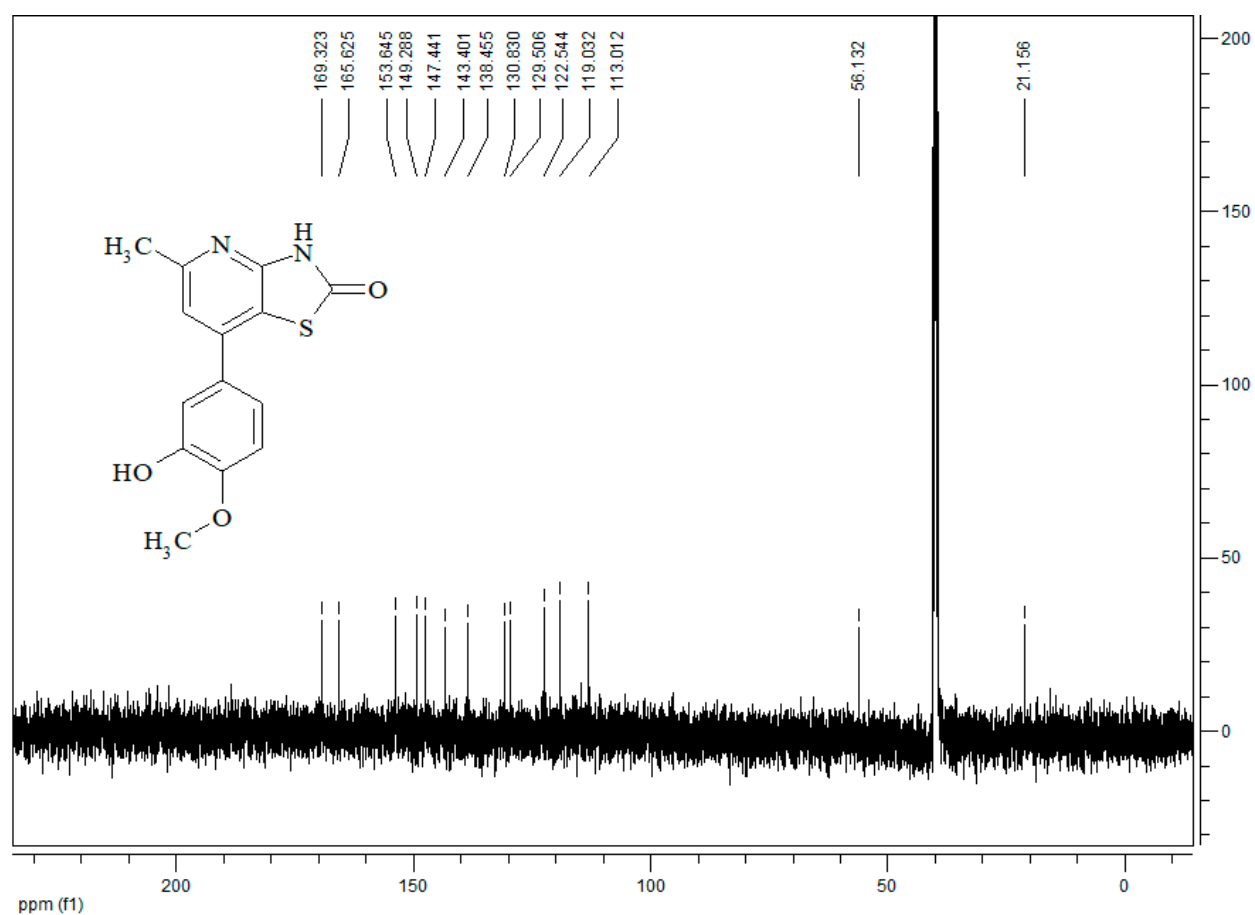

Figure S10.  $^{13}\text{C}$  NMR spectrum 3d.

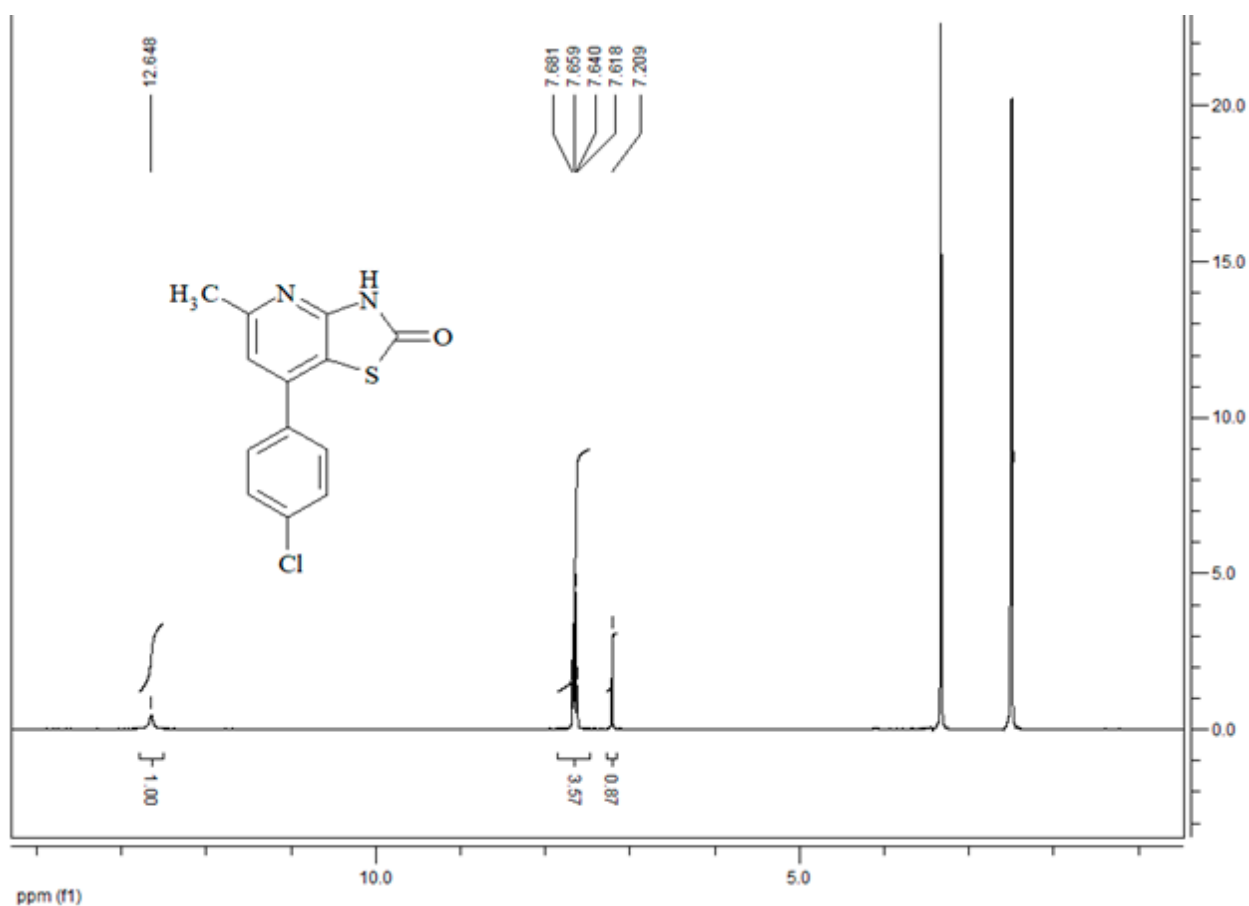

Figure S11. <sup>1</sup>H NMR spectrum 3e.

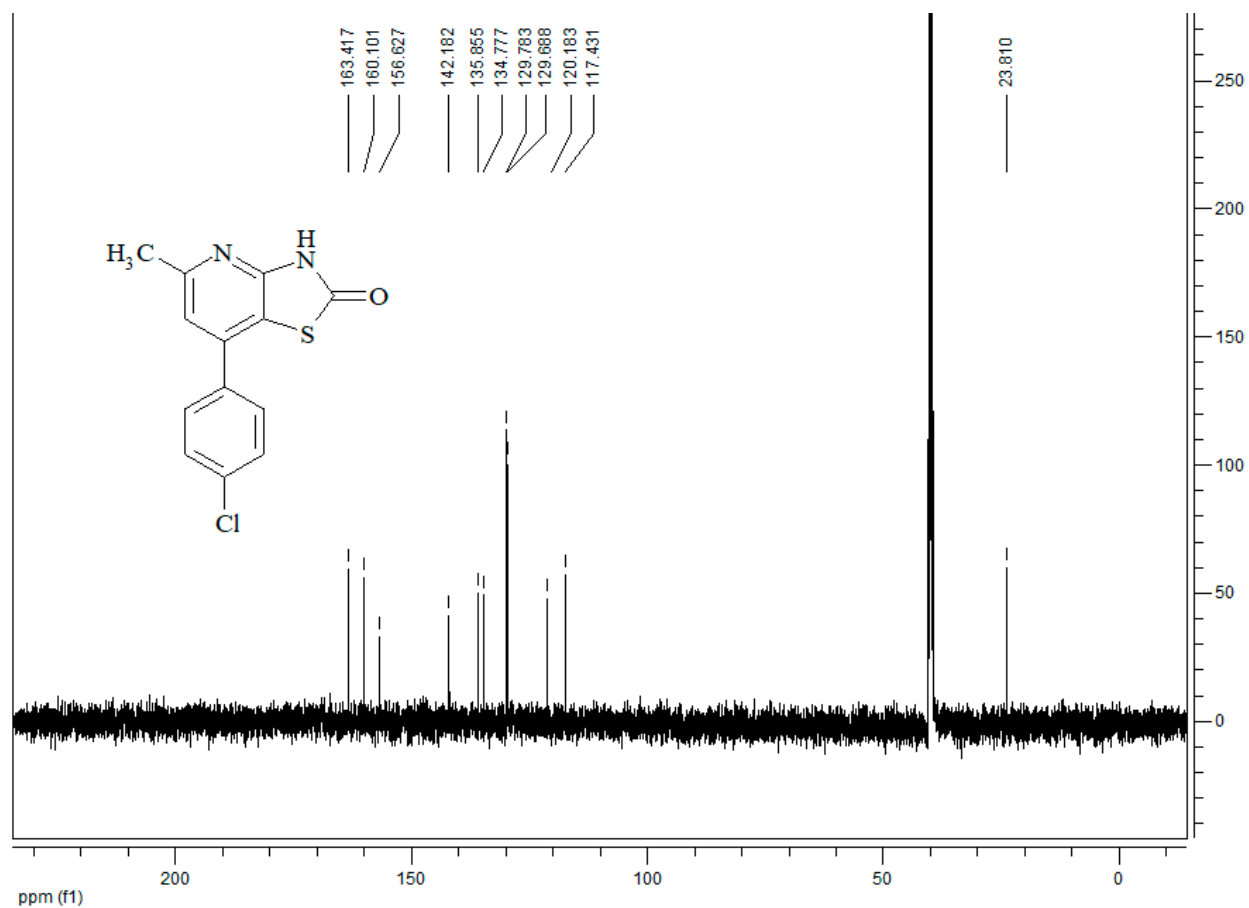

Figure S12. <sup>13</sup>C NMR spectrum 3e.



Mol Wt  
Exact Mass

| # | Time  | Area% |
|---|-------|-------|
| 1 | 0.946 | 2.99  |
| 2 | 1.353 | 97.01 |

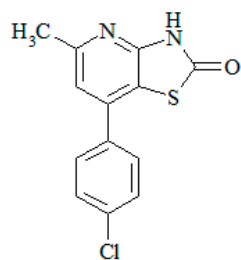

0 CLQ247600

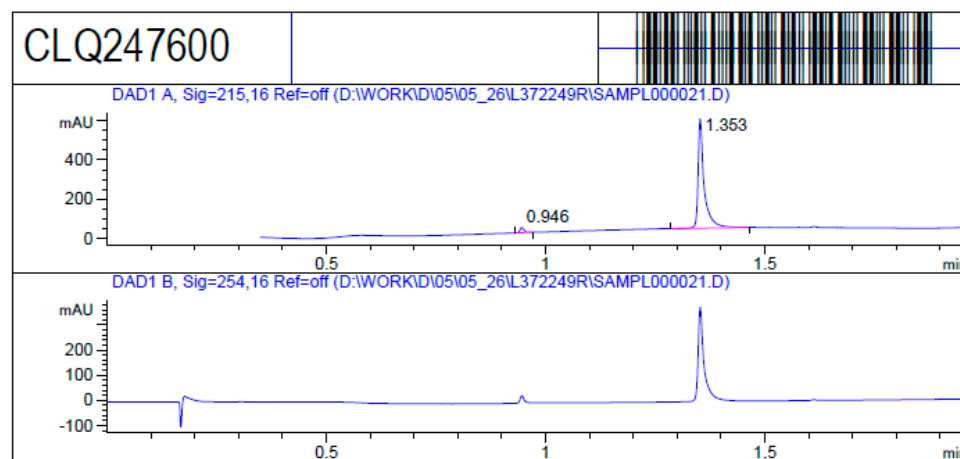

RT 1.378

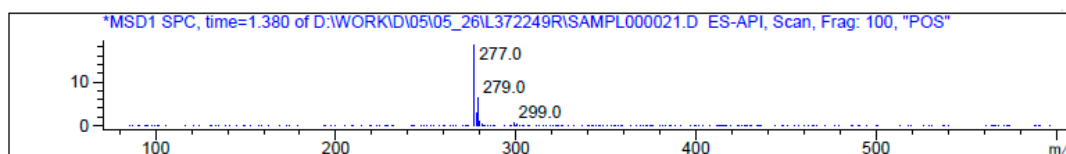

RT 1.376

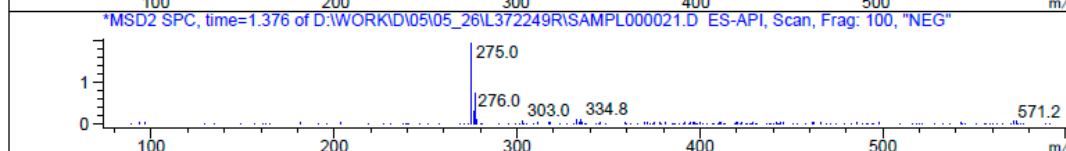

Figure S13. LC-MS spectrum 3e.

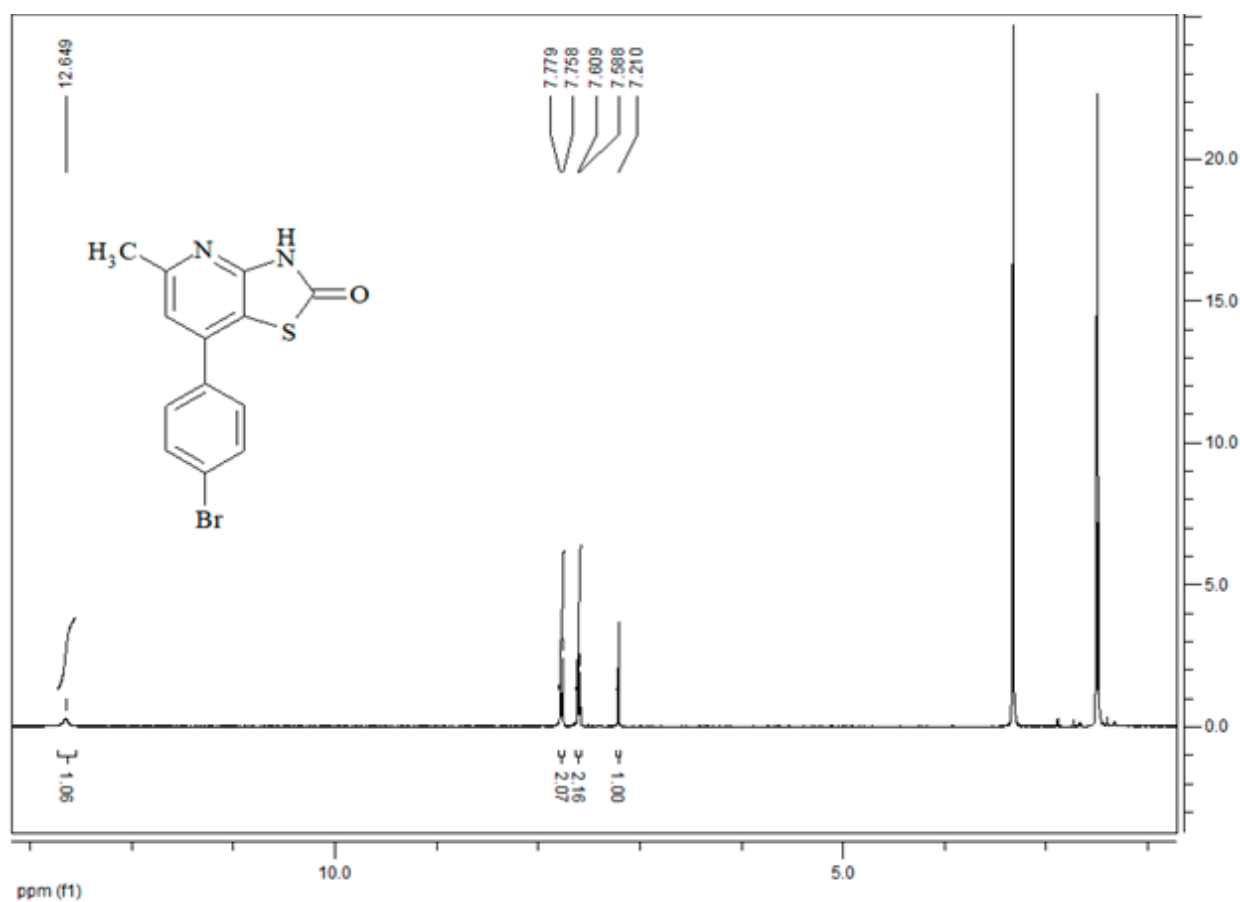

Figure S14. <sup>1</sup>H NMR spectrum 3f.

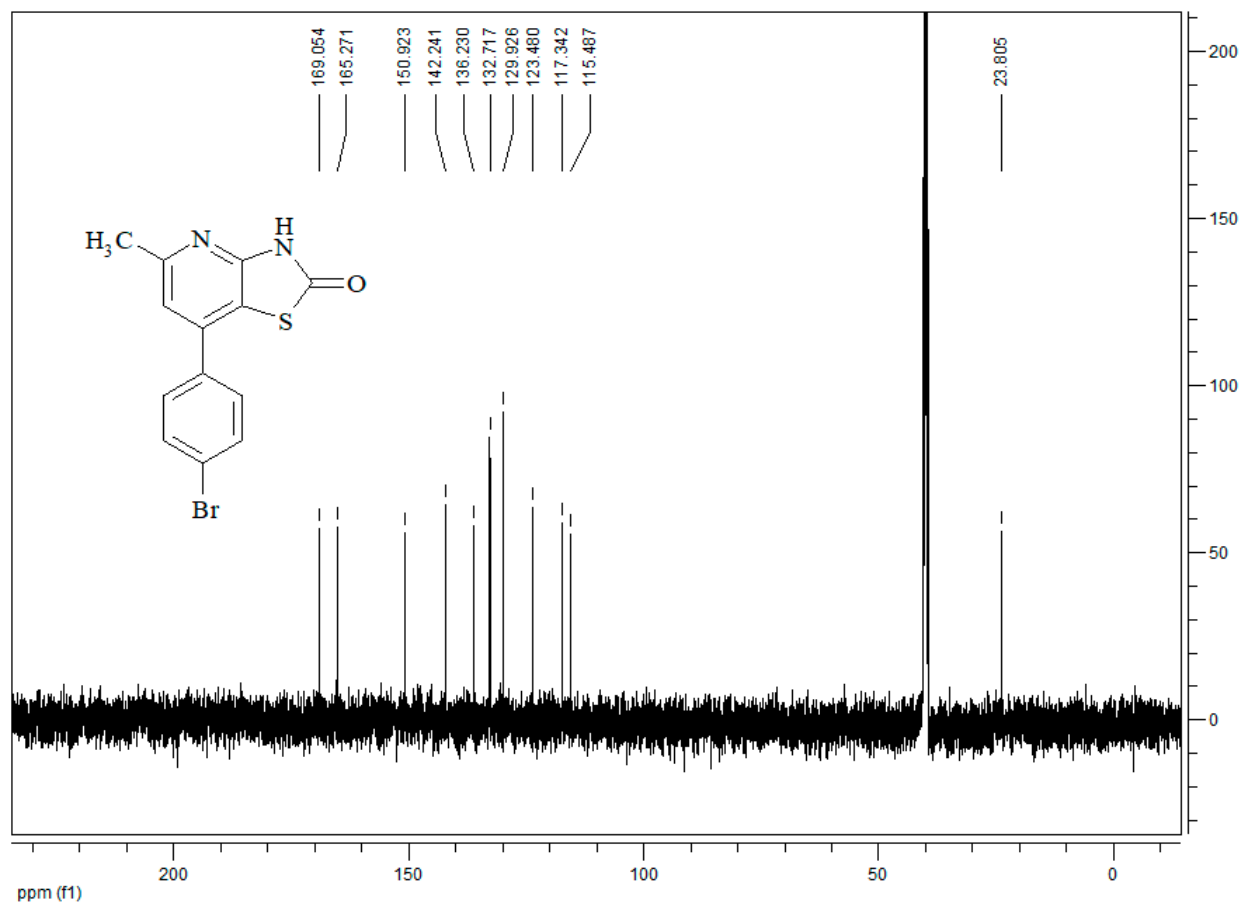

Figure S15. <sup>13</sup>C NMR spectrum 3f.

Mol Wt  
Exact Mass

| # | Time  | Area% |
|---|-------|-------|
| 1 | 1.379 | 98.21 |
| 2 | 1.644 | 1.79  |

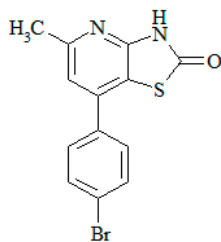

RT 1.405

RT 1.403

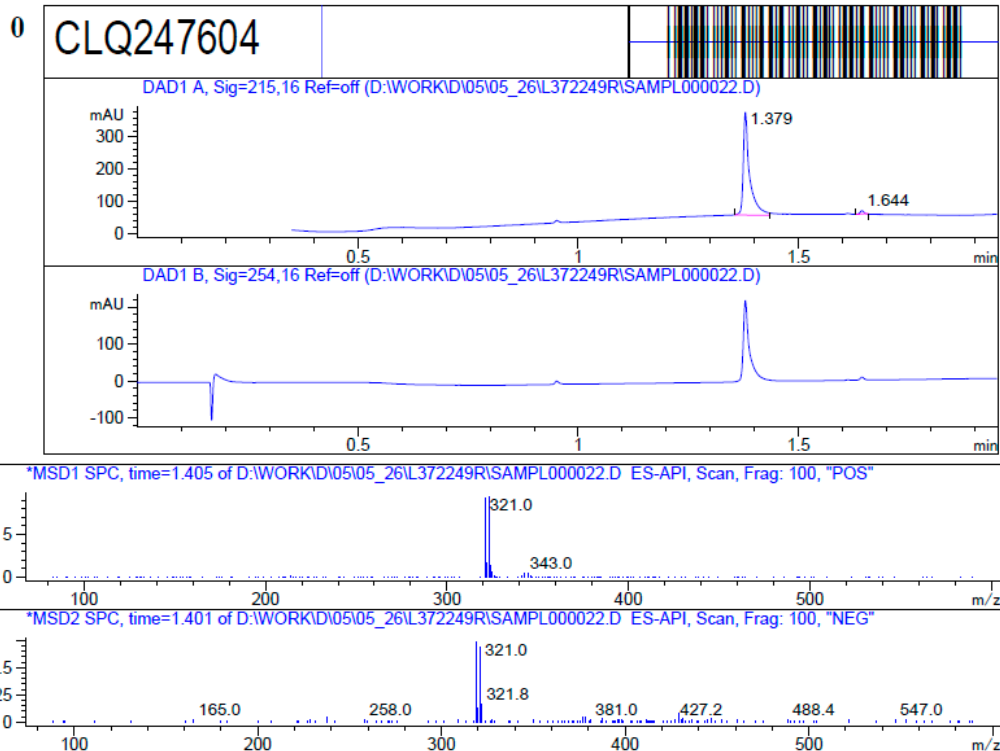

Figure S16. LC-MS spectrum 3f.

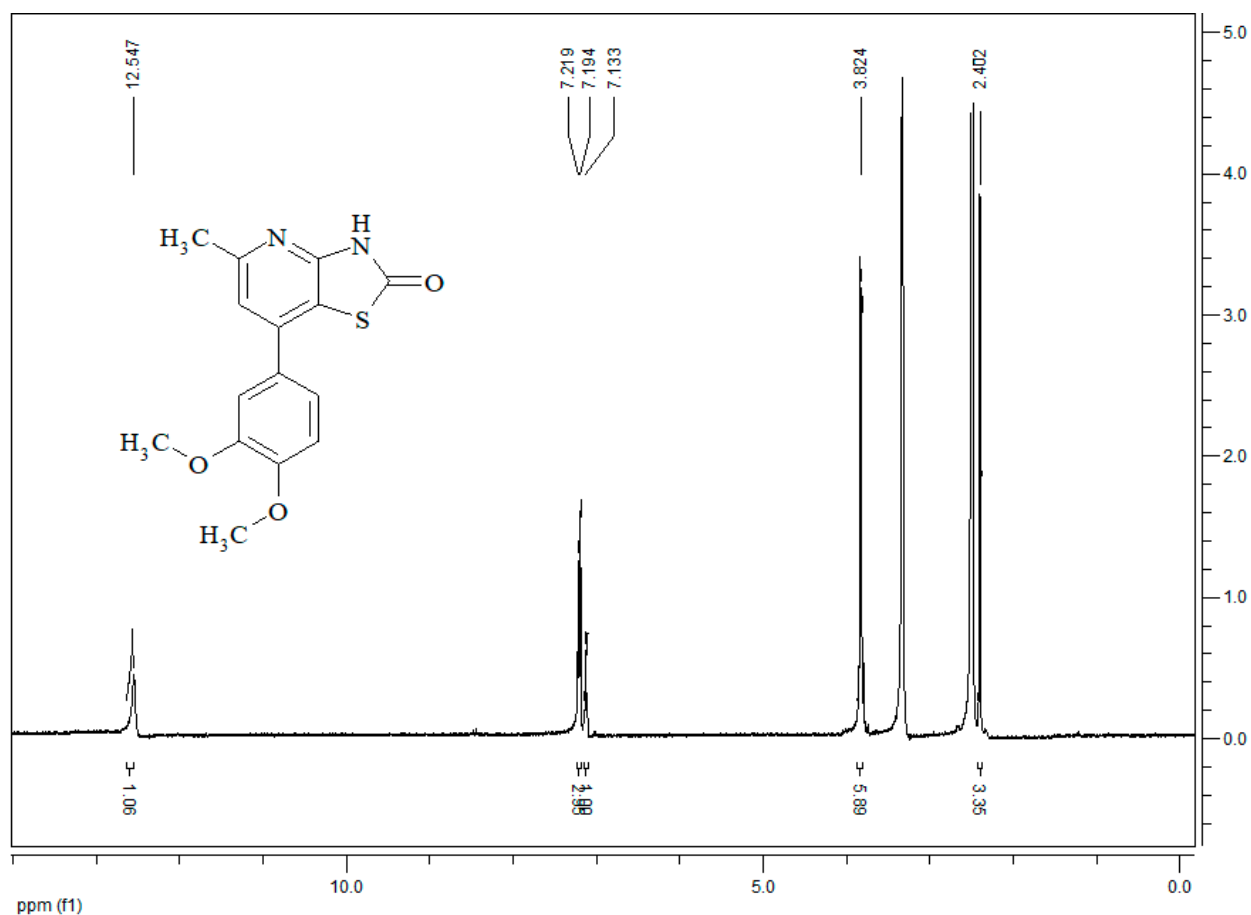

Figure S17. <sup>1</sup>H NMR spectrum 3g.

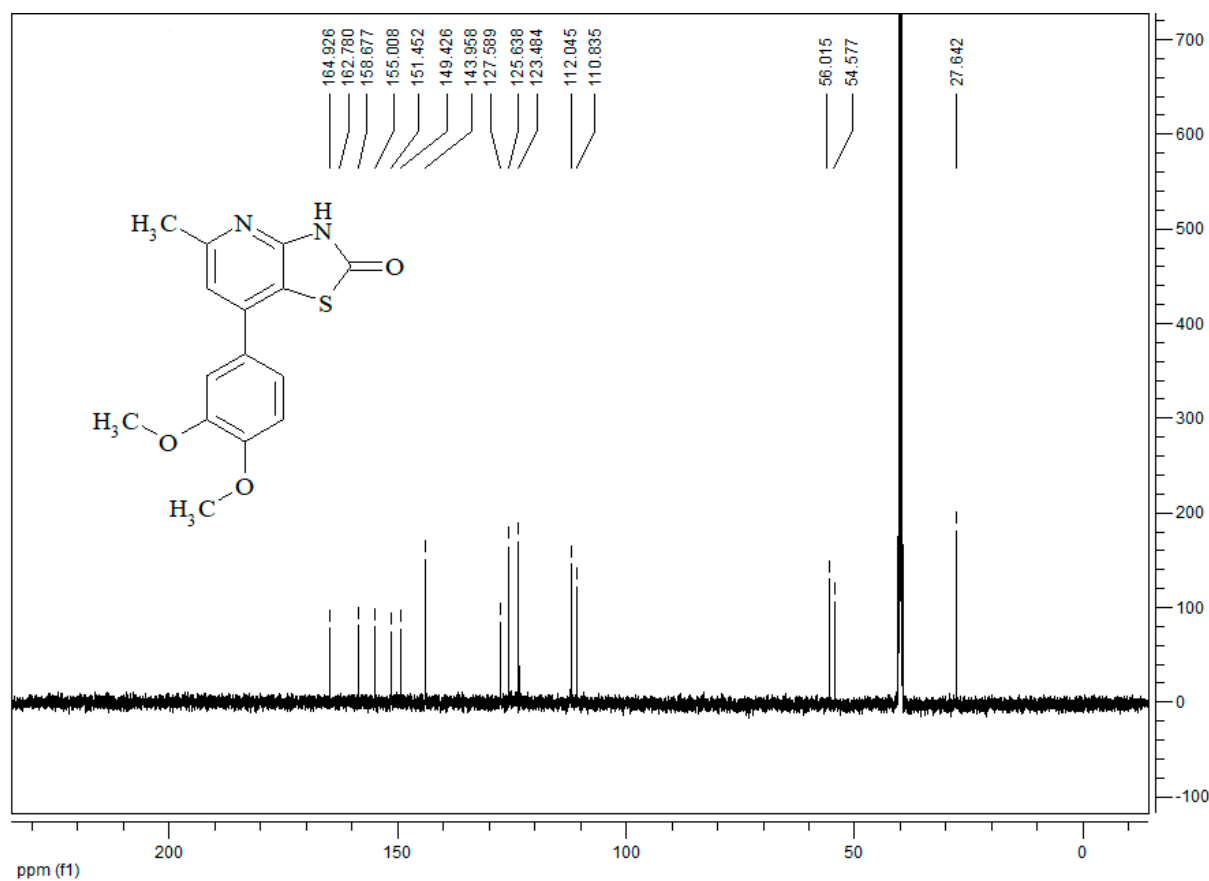

Figure S18. <sup>13</sup>C NMR spectrum 3g.
